# Supplementary material for: Hierachically porous nanocrystalline cobalt oxide monoliths through nanocasting
Source: Royal Society of Chemistry journal article supplement (doi:10.1039/b405208k), 2004-01-01
Supplement: b405208k.doc [file b405208k.doc]

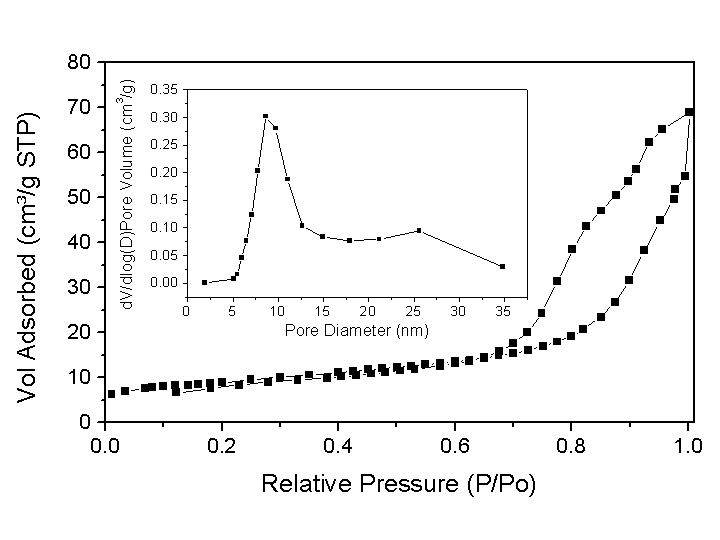


Supporting information, Smått et al. “Hierachically Porous Nanocrystalline Cobalt Oxide Monoliths Through Nanocasting”.

Nitrogen sorption isotherm measured at 77 K for the Co3O4 monolith after removal of the silica mold. Inset: BJH desorption pore size distribution plot.


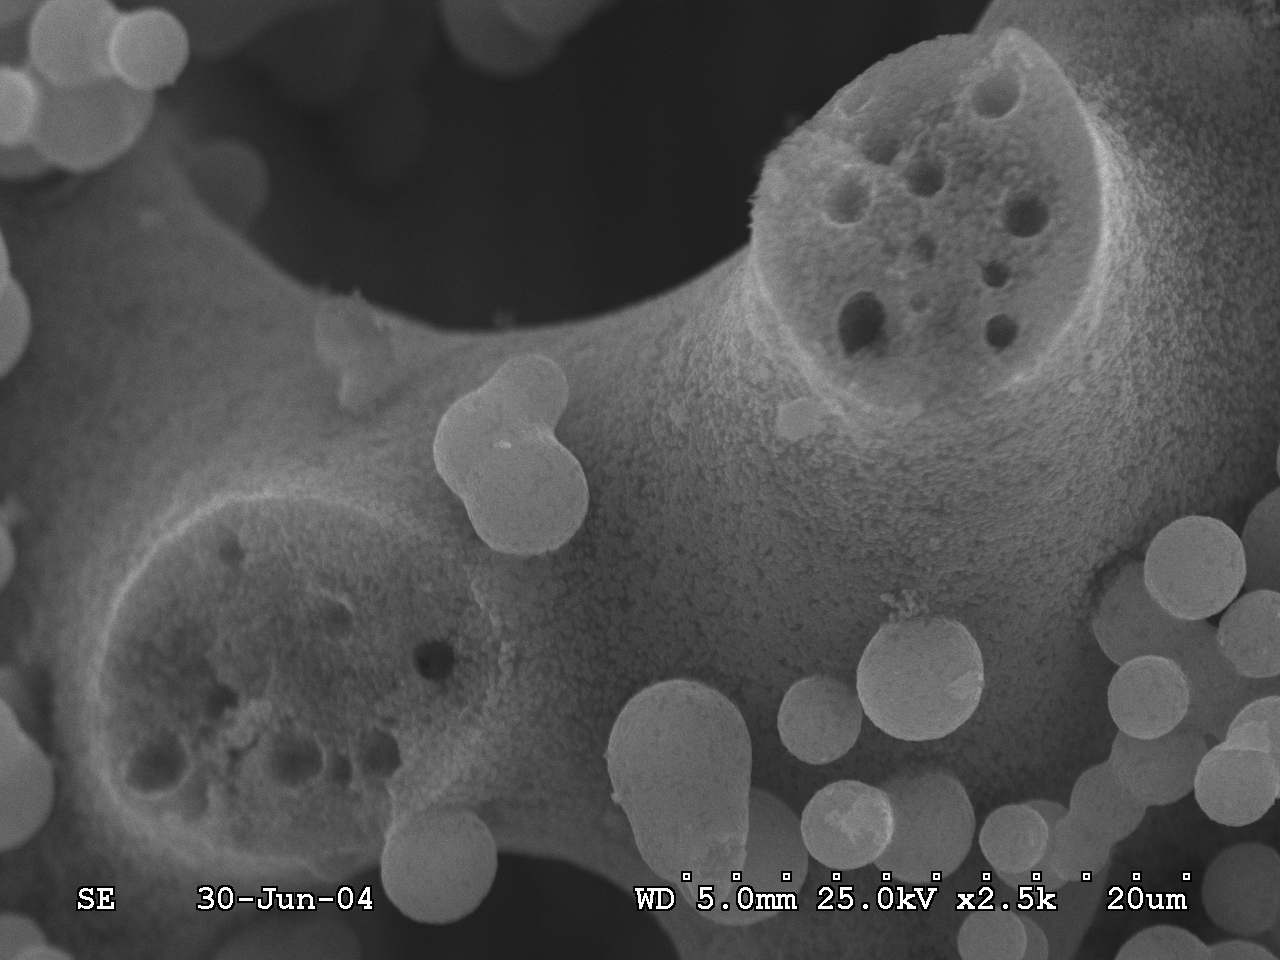


SEM image of the silica-Co4O4 composite after calcination showing the retained macroporous structure of the monolith after impregnation. Note that some larger Co3O4 particles are formed on top of the host silica structure.
